# Supplementary material for: Investigation of mechanical properties and structural integrity of graphene aerogels via molecular dynamics simulations
Source: Royal Society of Chemistry journal article supplement (doi:10.1039/d3cp02585c), 2023-01-01
Supplement: d3cp02585c1.pdf [file d3cp02585c1.pdf]

## Supplementary Information

### Investigation of mechanical properties and structural integrity of graphene aerogels via molecular dynamics simulations

Bowen Zheng<sup>1</sup>, Chen Liu<sup>2</sup>, Zhou Li<sup>3,4</sup>, Carlo Carraro<sup>4</sup>, Roya Maboudian<sup>4</sup>, Debbie G. Senesky<sup>3,5</sup>, and Grace X. Gu<sup>1,\*</sup>

<sup>1</sup>Department of Mechanical Engineering, University of California, Berkeley, CA 94720, United States

<sup>2</sup>Department of Mechanical Engineering, Stanford University, CA 94305, United States

<sup>3</sup>Department of Aeronautics & Astronautics, Stanford University, CA 94305, United States

<sup>4</sup>Department of Chemical and Biomolecular Engineering, and Berkeley Sensor & Actuator Center, University of California, Berkeley, CA 94720, United States

<sup>5</sup>Department of Electrical Engineering, Stanford University, CA 94305, United States

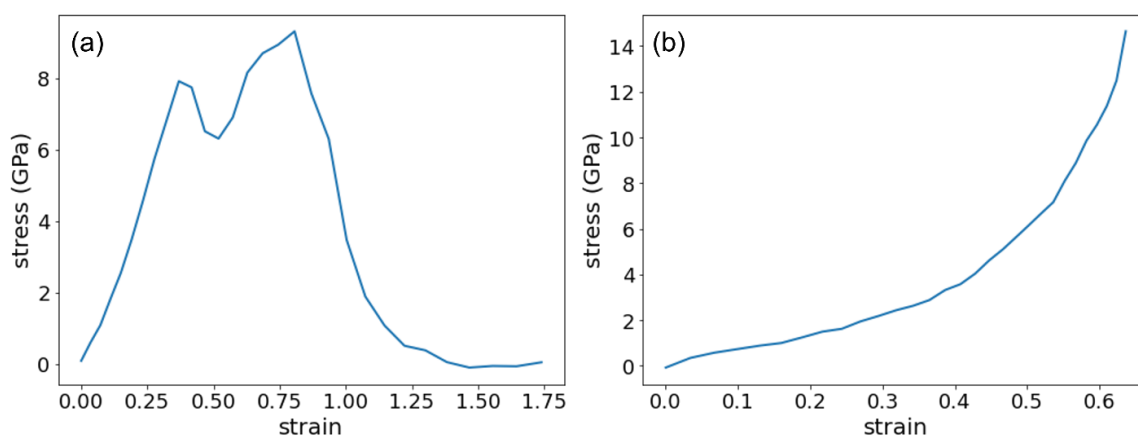

**Figure S1.** Stress-strain curves where  $N_{\text{flake}} = 200$ ,  $N_{\text{inc}} = 200$ ,  $\sigma = 5.0 \text{ \AA}$ ,  $N_{\text{cycles}} = 10$ , and  $T_A = 2000 \text{ K}$ . Stress-strain curves under (a) tension and (b) compression.

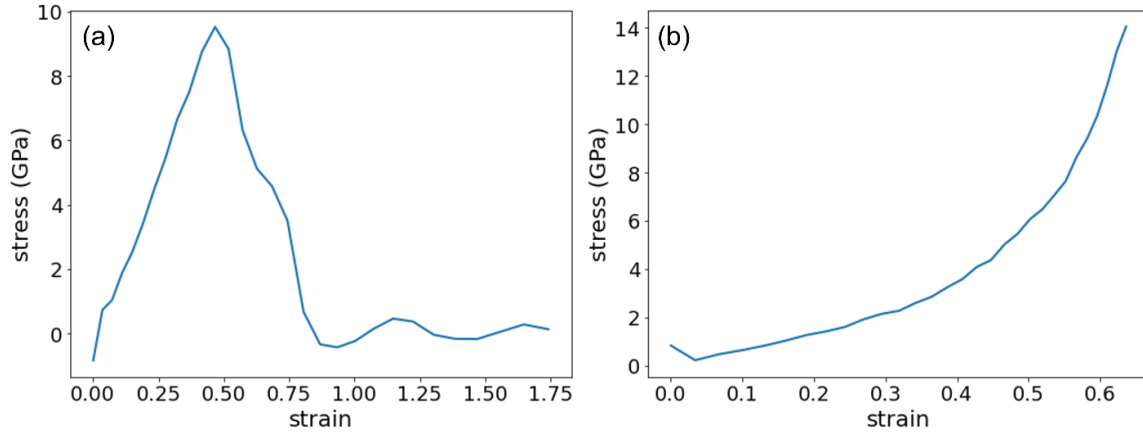

**Figure S2.** Stress-strain curves without the relaxation process after annealing cycles where  $N_{\text{flake}} = 200$ ,  $N_{\text{inc}} = 200$ ,  $\sigma = 5.0 \text{ \AA}$ ,  $N_{\text{cycles}} = 10$ , and  $T_A = 2000 \text{ K}$ . Stress-strain curves under (a) tension and (b) compression.

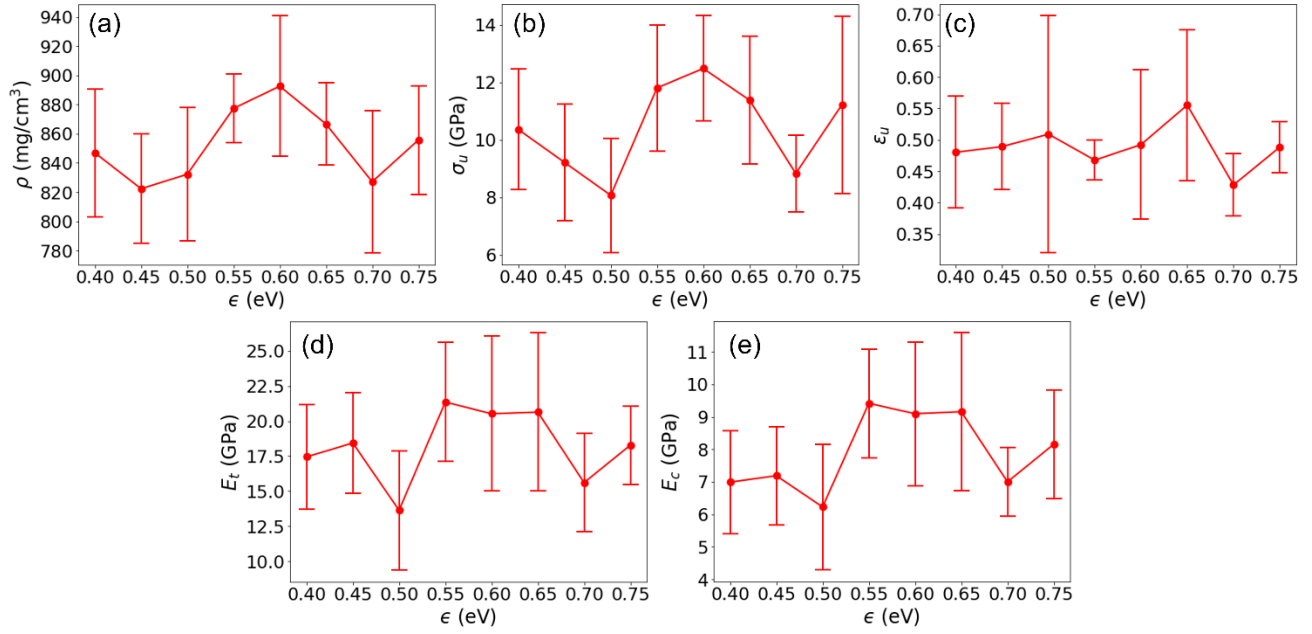

**Figure S3.** Mechanical properties of GA as a function of  $\epsilon$ . (a) Density  $\rho$ , (b) tensile strength  $\sigma_u$ , (c) tensile failure strain  $\epsilon_u$ , (d) tensile and (e) compressive moduli  $E_t$  and  $E_c$  of GA as a function of  $\epsilon$ .

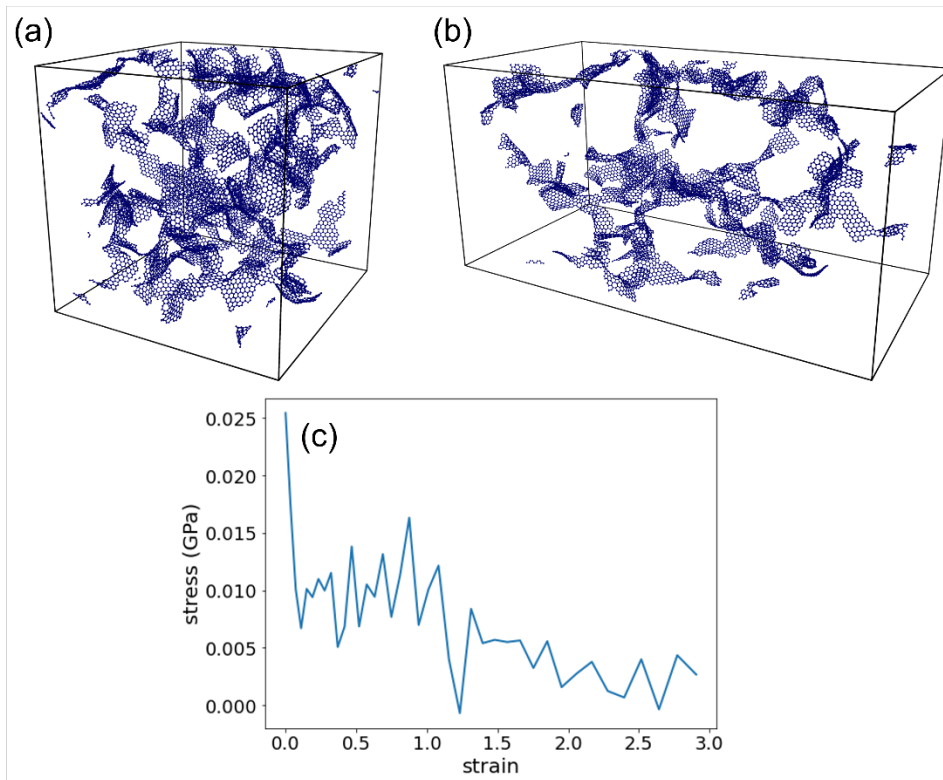

**Figure S4.** Disconnected GA structure. The structure when (a) unloaded and (b) under tension. (c) Stress-strain relation of the GA under tension.

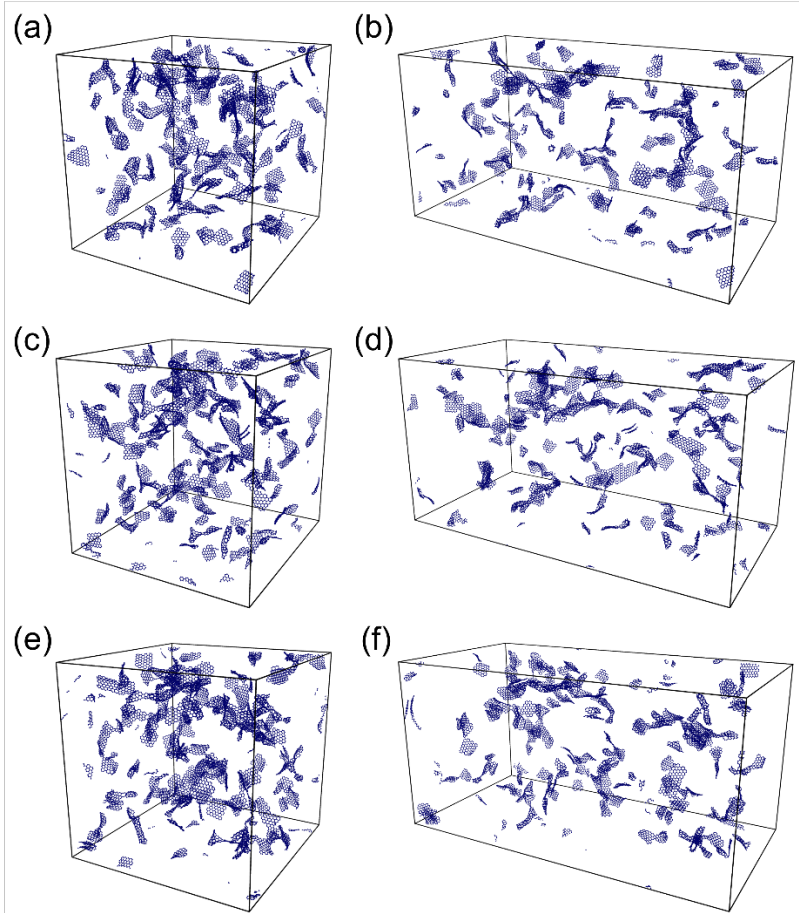

**Figure S5.** GA structure where  $N_{\text{flake}} = 200$ ,  $R = 5.0$ ,  $\sigma = 15.0 \text{ \AA}$ , and  $T_A = 2000 \text{ K}$  under various numbers of annealing cycles. Initial structure and the structure under tension of GAs prepared with (a) 10, (b) 20, and (c) 50 annealing cycles.  $N_{\text{bond/atom}}$  for (a-c) are 1.384, 1.386, 1.389, respectively.

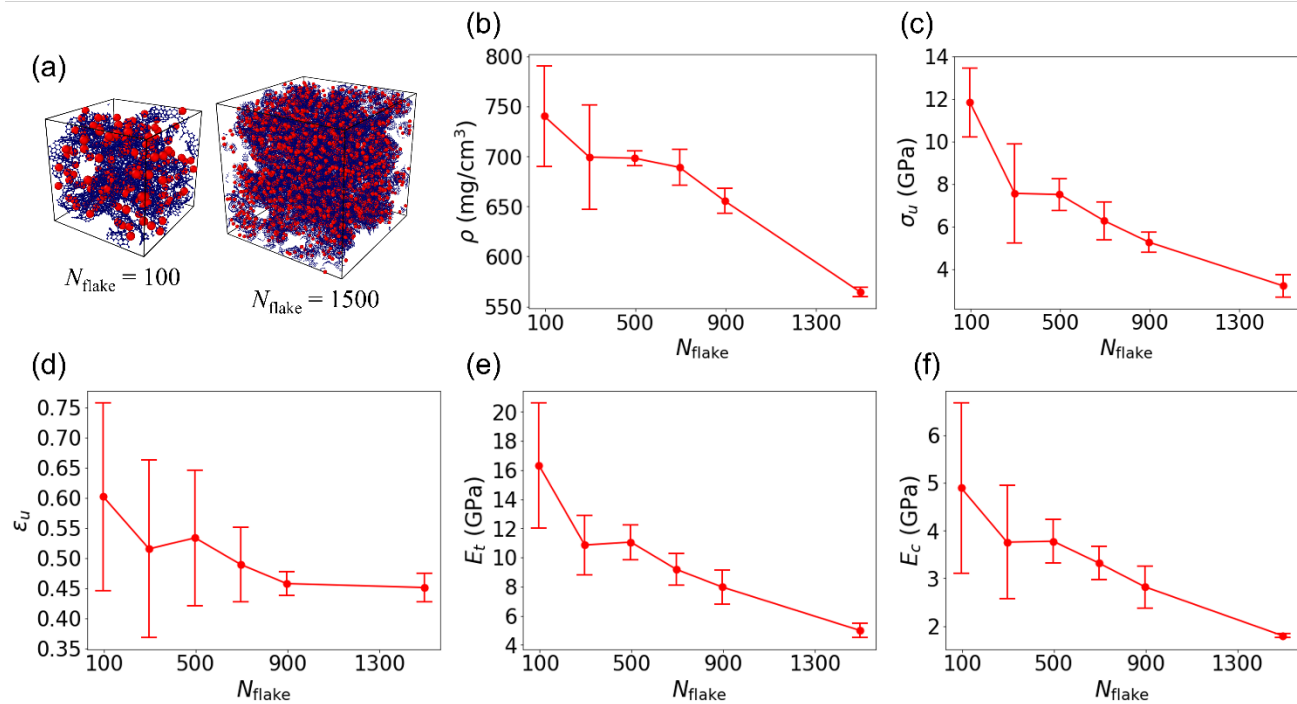

**Figure S6.** Mechanical properties of GA as a function of  $N_{flake}$ . (a) Illustration of the effect of  $N_{flake}$ . (b) Density  $\rho$ , (c) tensile strength  $\sigma_u$ , (d) tensile failure strain  $\epsilon_u$ , (e) tensile and (f) compressive moduli  $E_t$  and  $E_c$  of GA as a function of  $N_{flake}$ .

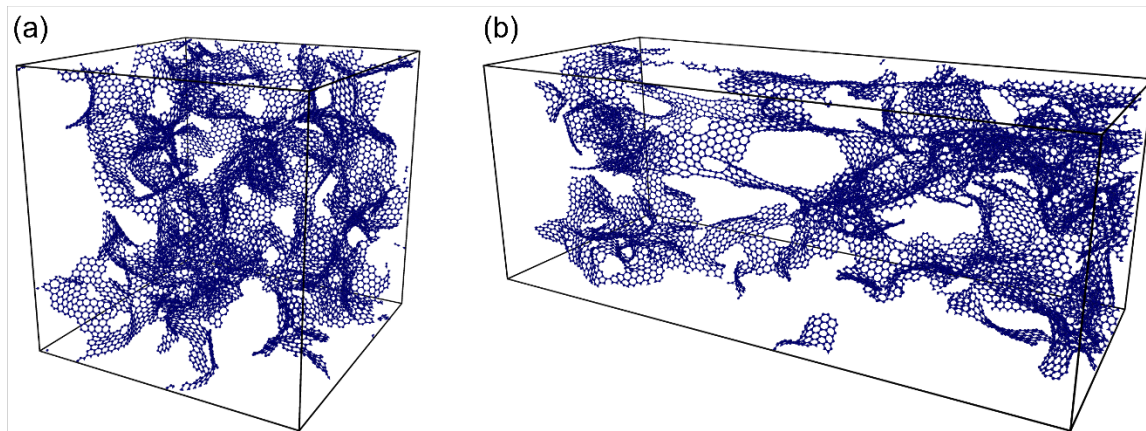

**Figure S7.** GA structure where  $N_{\text{flake}} = 200$ ,  $R = 1.0$ ,  $\sigma = 13.0 \text{ \AA}$ , and  $T_A = 2000 \text{ K}$ . The structure when (a) unloaded and (b) subject to tension.

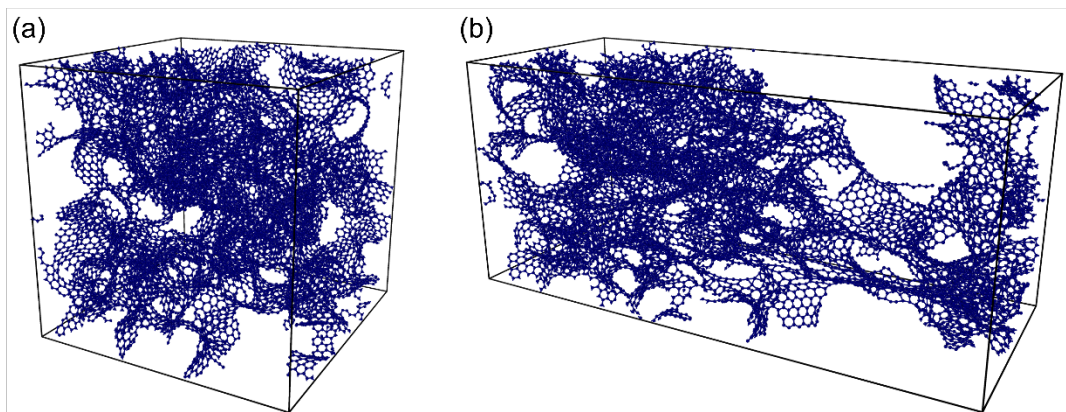

**Figure S8.** GA structure where  $N_{\text{flake}} = 200$ ,  $R = 5.5$ ,  $\sigma = 5.0 \text{ \AA}$ , and  $T_A = 2000 \text{ K}$ . The structure when (a) unloaded and (b) subject to tension.



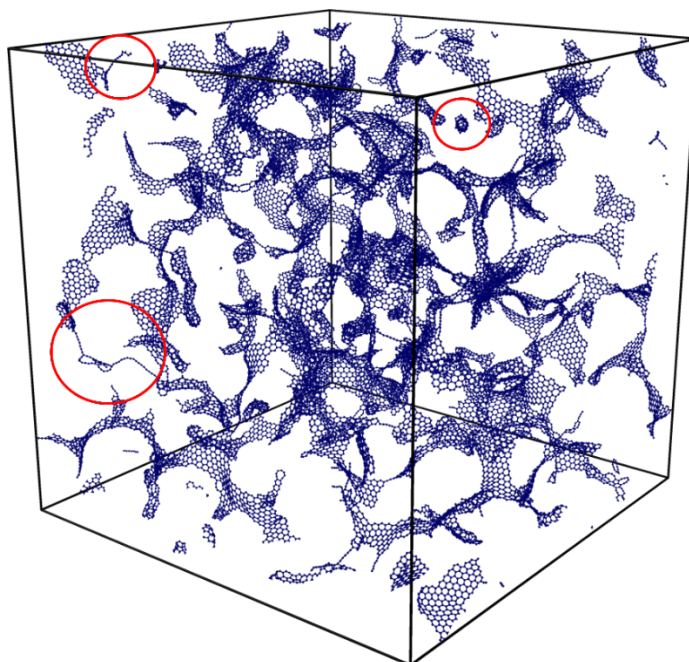

**Figure S9.** GA structure formed with annealing temperature  $T_A = 4000$  K where bond breakings and thermally unstable behavior are observed. Problematic geometries are circled.

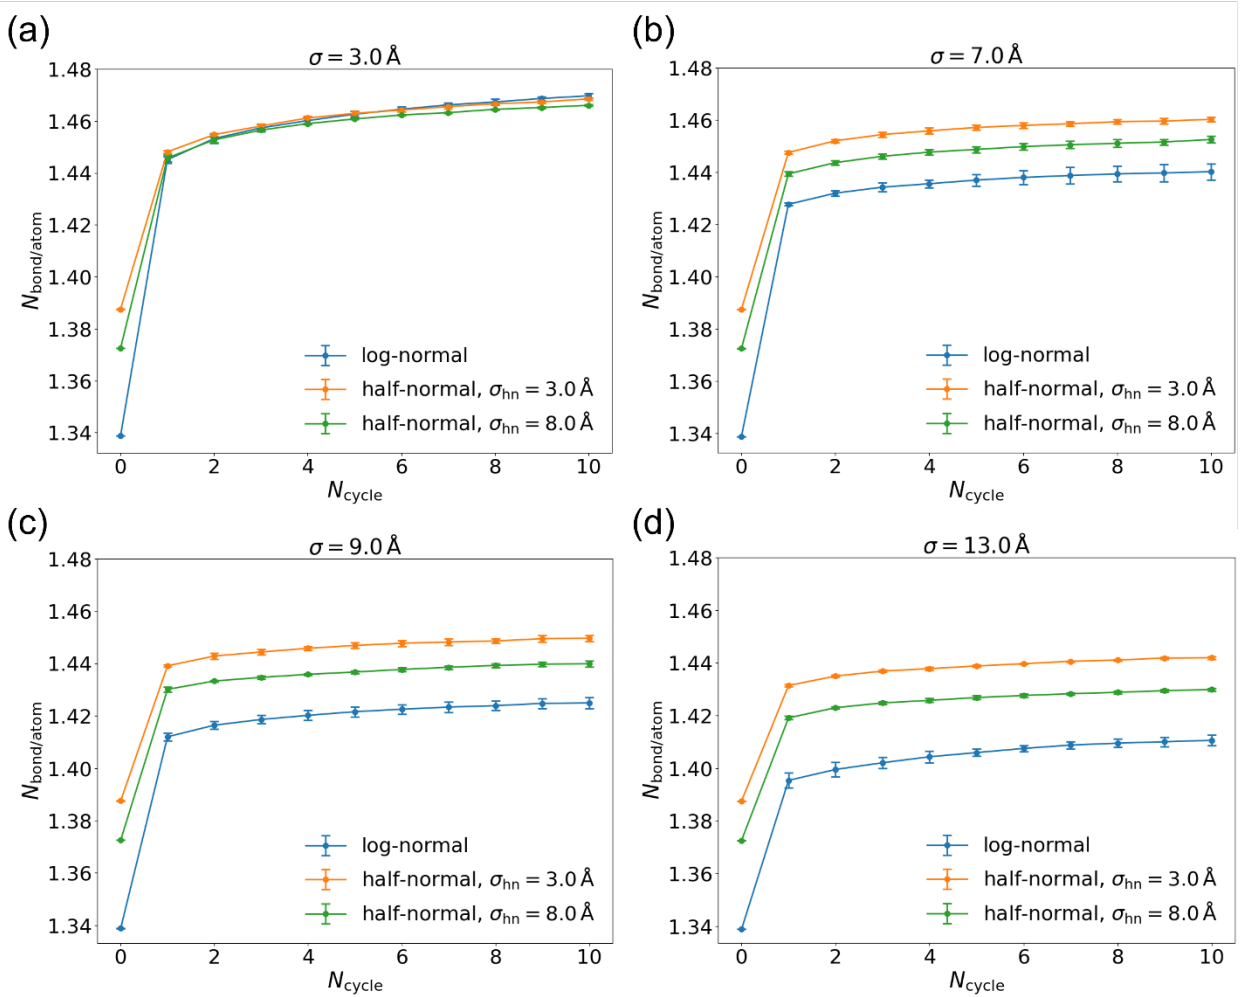

**Figure S10.** GA connectivity property under different distributions of graphene flake side length  $L$ .  $N_{\text{bond/atom}}$  versus  $N_{\text{cycle}}$  plots with (a)  $\sigma = 3.0 \text{ \AA}$ , (b)  $\sigma = 7.0 \text{ \AA}$ , (c)  $\sigma = 9.0 \text{ \AA}$ , and (d)  $\sigma = 13.0 \text{ \AA}$

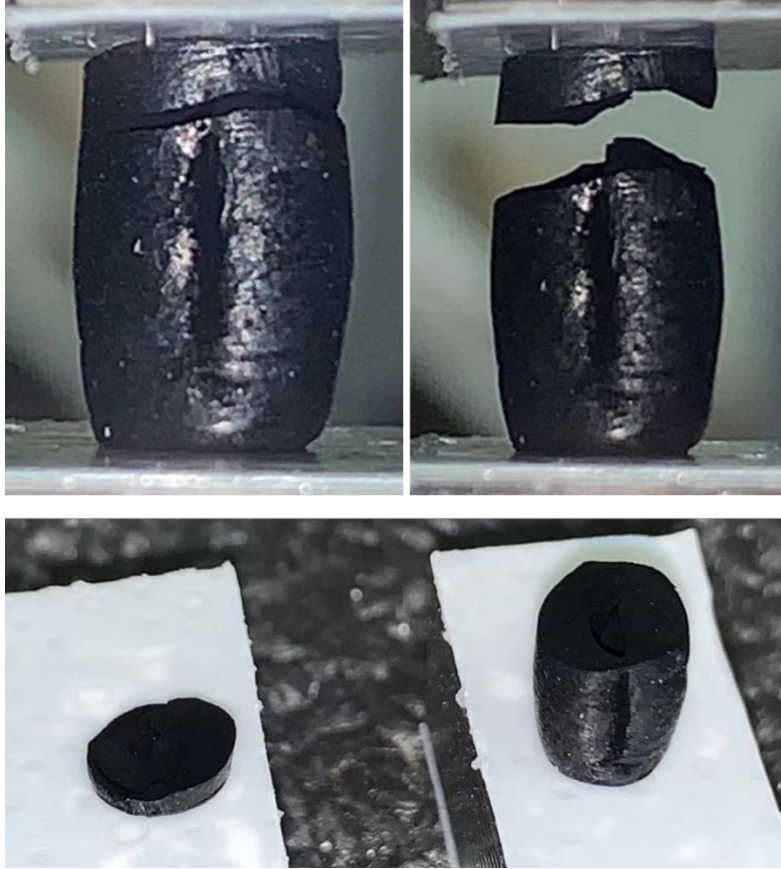

**Figure S11.** Images of GA showing catastrophic failure during tensile test. Compression tests were performed on dynamic mechanical analysis (DMA, TA Instrument Q800). A preload of 10 mN was applied on the GA samples to assure full contact. The samples were compressed to 80 % strain with a loading rate of 10 % strain/min. Tension tests were performed on universal testing machines (Instron) with a loading rate of 10 % strain/min.

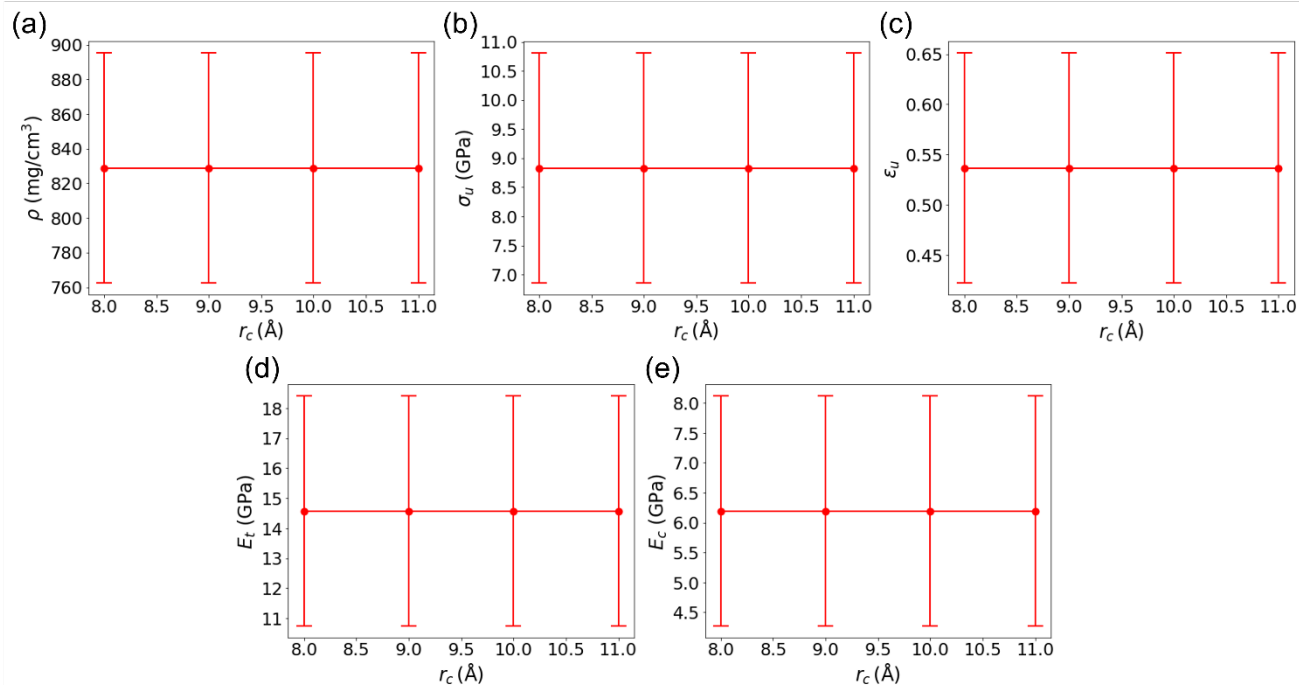

**Figure S12.** Mechanical properties of GA as a function of the cutoff distance  $r_c$ . (a) Density  $\rho$ , (b) tensile strength  $\sigma_u$ , (c) tensile failure strain  $\epsilon_u$ , (d) tensile and (e) compressive moduli  $E_t$  and  $E_c$  of GA as a function of  $r_c$ . LAMMPS performances for  $r_c = 8.0, 9.0, 10.0$  and  $11.0$  Å are 15.288, 14.791, 13.595 and 12.416 ns/day, respectively.
